# Supplementary material for: BcMF30a and BcMF30c, Two Novel Non-Tandem CCCH Zinc-Finger Proteins, Function in Pollen Development and Pollen Germination in Brassica campestris ssp. chinensis
Source: MDPI journal article supplement (doi:10.3390/ijms21176428), 2020-09-03
Supplement: s1 [file s1]

**Table S2 T<sub>0</sub> lines and gene editing of plants transformed by CRISPR-Cas9 vectors.**

| Target gene                      | CRISPR-Cas9 Vectors | No. of T <sub>0</sub> lines examined | No. of T <sub>0</sub> lines with mutations in <i>BcMF30a</i> | No. of T <sub>0</sub> lines with mutations in <i>BcMF30c</i> |
|----------------------------------|---------------------|--------------------------------------|--------------------------------------------------------------|--------------------------------------------------------------|
| <i>BcMF30a</i>                   | pBI-sgRNA-a         | 7                                    | 0                                                            | -                                                            |
| <i>BcMF30c</i>                   | pBI-sgRNA-c         | 4                                    | -                                                            | 0                                                            |
| <i>BcMF30a</i>                   | pCA-sgRNA-a         | 5                                    | 0                                                            | -                                                            |
| <i>BcMF30c</i>                   | pCA-sgRNA-c         | 6                                    | -                                                            | 0                                                            |
| <i>BcMF30a</i><br><i>BcMF30c</i> | pCA-sgRNA-ac        | 31                                   | 5                                                            | 5                                                            |

**Table S3 Genotypes of 9 *bcmf30a bcmf30c* plants generated by line ko-41.**

| T <sub>1</sub> plants | T-DNA insertion | Genotype of BcC3H18a | Genotype of BcC3H18c |
|-----------------------|-----------------|----------------------|----------------------|
| ko-41-1               | -               | C/T                  | T                    |
| ko-41-2               | +               | C                    | G/T                  |
| ko-41-3               | +               | C/T                  | G/T                  |
| ko-41-4               | +               | C/T                  | G/T                  |
| ko-41-5               | +               | C/T                  | G/T                  |
| ko-41-6               | +               | C/T                  | G/T                  |
| ko-41-7               | -               | C/T                  | T                    |
| ko-41-8               | +               | C/T                  | T                    |
| ko-41-9               | +               | C/T                  | G/T                  |

Note: (1) “+” represents T-DNA insertion, “-” represents no T-DNA insertion. (2) “C/T” (“G/T”) represents biallelic mutation, i.e., insert C or T (G or T) before the PAM sites of the alleles. “C” (“T”) represents homozygous mutations, i.e., C (T) was inserted before the PAM sites of both alleles.

**Table S4 Sequence of primers used in this study.**

| Experiment                     | Primer Name   | Sequence-F(5'-3')                            | Sequence-R(5'-3')                            |
|--------------------------------|---------------|----------------------------------------------|----------------------------------------------|
| BcMF30a CDS                    | BcMF30a-1F/R  | ATGAATTTACAGAATCGAT                          | CTAGGTAAGTGTGAAATCTC                         |
| BcMF30c CDS                    | BcMF30c-1F/R  | ATGAATTTACAGAATCTATGAAC                      | CTATGTAAGTGTGAAATCTCCTT                      |
| BcMF30a RT-PCR                 | BcMF30a-2F/R  | GTGGATTTCGTTGCATAGC                          | GGGTCCTTGCCTATTTTTT                          |
| BcMF30c RT-PCR                 | BcMF30c-2F/R  | TGAGGTTGATTCACTCCAGT                         | GGTCCTACCGTATTTTTTCGA                        |
| UBC10 RT-PCR                   | UBC10-1F/R    | GGCAACGATAATGGGTCCTAC                        | CTCCGTGCAGTGGACTCATAC                        |
| BcMF30a qRT-PCR                | BcMF30a-3F/R  | GTGGATTTCGTTGCATAGC                          | TGATCTCCTGCTTGTCTTAA                         |
| BcMF30c qRT-PCR                | BcMF30c-3F/R  | GTGCAATAATGATGAAGTAGTG                       | GTTGTTGGATTCTGTTGTGC                         |
| UBC10 qRT-PCR                  | UBC10-2F/R    | GGGTCTACAGACAGTCCTTAC                        | ATGGAACACCTTCGTCTTAAA                        |
| BcMF30a Promoter               | BcMF30a-4F/R  | AGTTAGTTCTTAATTTTAGGTATG                     | CTCCAATAATATCCGTCTTATCA                      |
| BcMF30c Promoter               | BcMF30c-4F/R  | TCCATTTCCCTTCTTATTGT                         | CTCTAATAATAACGTCTTATCCCA                     |
| ProBcMF30a:GUS                 | BcMF30a-5F/R  | TGATTACGCCAAGCTTAGTTAGTTCC<br>TTAATTTTAGGTAT | GACGTAACATCTCCAATAATATCC<br>GTCTTATCA        |
| ProBcMF30c:GUS                 | BcMF30c-5F/R  | TGATTACGCCAAGCTTTCCATTTCCC<br>TTCTTATTGT     | GACGTAACATCTCTAATAATAACG<br>TCTTATCCCA       |
| BD-BcMF30a                     | BcMF30a-6F/R  | CATGGAGGCCGAATTCATGAATTTT<br>ACAGAATCGAT     | GCAGGTCGACGGATCCCTAGGTAA<br>CTGTCGAAATCTC    |
| BD-BcMF30c                     | BcMF30c-6F/R  | CATGGAGGCCGAATTCATGAATTTT<br>ACAGAATCTATGAAC | GCAGGTCGACGGATCCCTATGTAA<br>CTGTTGAAATCTCCTT |
| BcMF30a-eGFP                   | BcMF30a-7F/R  | ATTTACAATTACCATGAATTTACAG<br>AATCGAT         | GCCCTTGCTCACCATGGTAACTGTC<br>GAAATCTCCT      |
| BcMF30c-eGFP                   | BcMF30c-7F/R  | ATTTACAATTACCATGAATTTACAG<br>AATCTATGA       | GCCCTTGCTCACCATTGTAAGTGT<br>GAAATCTCCTT      |
| eGFP-BcMF30a                   | BcMF30a-8F/R  | GCTGTACAAGGGATCCATGAATTTT<br>ACAGAATCGAT     | TAATTAAGTCTCTAGACTAGGTAAC<br>TGTCGAAATCTC    |
| eGFP-BcMF30c                   | BcMF30c-8F/R  | GCTGTACAAGGGATCCATGAATTTT<br>ACAGAATCTATGAAC | TAATTAAGTCTCTAGACTATGTAA<br>TGTTGAAATCTCCTT  |
| sgRNA-a                        | sgRNA-a-1F/R  | GATTGCGTGGAATACCGGCAGTTG                     | AAACCAACTGCCGGTATTTCCACG<br>C                |
| sgRNA-c                        | sgRNA-c-1F/R  | GATTGTGATGCAAGAACATGGCGAC                    | AAACGTCGCCATGTTCTTGCATCAC                    |
| sgRNA-ac                       | sgRNA-ac-1F/R | GATTGAGCGAGCAAGAAGCTTGGTG                    | AAACCACCAAGCTTCTTGCTCGCTC                    |
| CRISPR/Cas9-Seq                | Seq-F         | TGTAAAACGACGGCCAGT                           |                                              |
| CRISPR/Cas9-PCR                | PCR-F/R       | GATACACCAGACGGAAGAACC                        | GATGTCGCTCAGCAGGATG                          |
| CRISPR/Cas9<br>T-DNA Insertion | sgRNA-a-2F/R  | ACACAGGAAACAGCTATGACC                        | AAACCAACTGCCGGTATTTCCACG<br>C                |
|                                | sgRNA-c-2F/R  | ACACAGGAAACAGCTATGACC                        | AAACGTCGCCATGTTCTTGCATCAC                    |
|                                | sgRNA-ac-2F/R | ACACAGGAAACAGCTATGACC                        | AAACCACCAAGCTTCTTGCTCGCTC                    |
| BcMF30a Mutation               | BcMF30a-9F/R  | CAGAAGAAGTGATAAGACGGA                        | AAGGCTTGACGAGAACACG                          |
| BcMF30a Mutation               | BcMF30c-9F/R  | GGACTTTTGGGATAAGACGT                         | TGCTGGGAATGTCAGGTAA                          |
